# Supplementary material for: Assessment of stress responses in rhesus macaques (Macaca mulatta) to daily routine procedures in system neuroscience based on salivary cortisol concentrations
Source: PubMed Central journal article supplement (PMC5749769; doi:10.1371/journal.pone.0190190), 2018-01-02
Supplement: pone.0190190.s001.pdf [file pone.0190190.s001.pdf]

**S1 Dataset: Raw data to perform statistical analysis.** Cortisol values per animal, condition, collection time, and date.

| date<br>[ddmmyy] | collect_time<br>[min] | animal_ID | chamber_<br>on | Cortisol<br>[ng_ml] | condition       | fluid      |
|------------------|-----------------------|-----------|----------------|---------------------|-----------------|------------|
| 02.06.08         | 570                   | Pie       | yes            | 16.92               | after_cleaning  | controlled |
| 02.06.08         | 585                   | Syl       | yes            | 20.95               | before_cleaning | controlled |
| 02.06.08         | 600                   | Sun       | no             | 9.91                | before_cleaning | controlled |
| 03.06.08         | 505                   | Car       | no             | 20.85               | before_cleaning | controlled |
| 03.06.08         | 530                   | Sun       | no             | 11.42               | before_cleaning | controlled |
| 03.06.08         | 640                   | Syl       | yes            | 11.19               | before_cleaning | controlled |
| 03.06.08         | 720                   | Gra       | no             | 19                  | before_cleaning | controlled |
| 04.06.08         | 495                   | Car       | no             | 18.6                | before_cleaning | controlled |
| 04.06.08         | 625                   | Sun       | no             | 13.12               | before_cleaning | controlled |
| 05.06.08         | 500                   | Mar       | no             | 7.51                | before_cleaning | controlled |
| 05.06.08         | 525                   | Car       | no             | 11.93               | before_cleaning | controlled |
| 05.06.08         | 880                   | Syl       | yes            | 12.94               | before_cleaning | controlled |
| 09.06.08         | 510                   | Wal       | yes            | 12.33               | before_cleaning | free       |
| 09.06.08         | 885                   | Tin       | yes            | 22.28               | before_cleaning | controlled |
| 09.06.08         | 940                   | Syl       | yes            | 5.4                 | before_cleaning | free       |
| 10.06.08         | 540                   | Sun       | no             | 13.11               | before_cleaning | controlled |
| 10.06.08         | 790                   | Wal       | yes            | 7.17                | before_cleaning | free       |
| 10.06.08         | 810                   | Syl       | yes            | 6.97                | before_cleaning | free       |
| 10.06.08         | 860                   | Tin       | yes            | 14.77               | before_cleaning | controlled |
| 11.06.08         | 510                   | Wal       | yes            | 12.03               | before_cleaning | free       |
| 11.06.08         | 640                   | Tin       | yes            | 19.27               | before_cleaning | controlled |
| 11.06.08         | 945                   | Syl       | yes            | 5.21                | before_cleaning | free       |
| 12.06.08         | 690                   | Sun       | no             | 15.5                | before_cleaning | controlled |
| 12.06.08         | 800                   | Tin       | yes            | 21.49               | before_cleaning | controlled |
| 12.06.08         | 850                   | Syl       | yes            | 9.98                | before_cleaning | free       |
| 13.06.08         | 685                   | Sun       | no             | 23.7                | before_cleaning | controlled |
| 13.06.08         | 725                   | Tin       | yes            | 31.26               | before_cleaning | controlled |
| 13.06.08         | 960                   | Syl       | yes            | 10.55               | before_cleaning | free       |
| 14.06.08         | 565                   | Wal       | yes            | 8.63                | before_cleaning | free       |
| 16.06.08         | 670                   | Pie       | yes            | 22.4                | before_cleaning | controlled |
| 16.06.08         | 855                   | Syl       | yes            | 15.66               | before_cleaning | free       |
| 17.06.08         | 510                   | Wal       | yes            | 6.37                | before_cleaning | controlled |
| 17.06.08         | 555                   | Pie       | yes            | 17.86               | before_cleaning | controlled |
| 17.06.08         | 570                   | Sun       | no             | 11.7                | before_cleaning | controlled |
| 17.06.08         | 810                   | Syl       | yes            | 12.52               | before_cleaning | controlled |
| 18.06.08         | 525                   | Mar       | no             | 27.26               | before_cleaning | controlled |
| 18.06.08         | 535                   | Wal       | yes            | 6.17                | before_cleaning | controlled |
| 18.06.08         | 970                   | Syl       | yes            | 15.57               | before_cleaning | controlled |
| 19.06.08         | 820                   | Tin       | yes            | 25.88               | before_cleaning | controlled |
| 20.06.08         | 560                   | Pie       | yes            | 25.4                | before_cleaning | controlled |
| 20.06.08         | 730                   | Syl       | yes            | 25.2                | before_cleaning | controlled |

|          |     |     |     |       |                 |            |
|----------|-----|-----|-----|-------|-----------------|------------|
| 21.06.08 | 455 | Wal | yes | 8.57  | before_cleaning | controlled |
| 22.06.08 | 485 | Wal | yes | 9.27  | before_cleaning | controlled |
| 23.06.08 | 510 | Wal | yes | 11.19 | before_cleaning | controlled |
| 23.06.08 | 630 | Tin | yes | 13.11 | before_cleaning | controlled |
| 23.06.08 | 645 | Syl | yes | 15.38 | before_cleaning | controlled |
| 23.06.08 | 820 | Sun | no  | 13.38 | before_cleaning | controlled |
| 24.06.08 | 565 | Tin | yes | 23.97 | before_cleaning | controlled |
| 24.06.08 | 635 | Sun | no  | 17.27 | before_cleaning | controlled |
| 24.06.08 | 810 | Mar | no  | 8.6   | before_cleaning | controlled |
| 24.06.08 | 815 | Pie | yes | 8.13  | before_cleaning | controlled |
| 24.06.08 | 860 | Syl | yes | 12.48 | before_cleaning | controlled |
| 25.06.08 | 525 | Sun | no  | 27.6  | before_cleaning | controlled |
| 25.06.08 | 630 | Pie | yes | 13.53 | before_cleaning | controlled |
| 25.06.08 | 650 | Syl | yes | 14.04 | before_cleaning | controlled |
| 25.06.08 | 830 | Tin | yes | 16.13 | before_cleaning | controlled |
| 26.06.08 | 555 | Sun | no  | 19.02 | before_cleaning | controlled |
| 26.06.08 | 835 | Tin | yes | 15.75 | before_cleaning | controlled |
| 30.06.08 | 555 | Tin | yes | 23.01 | before_cleaning | controlled |
| 30.06.08 | 900 | Syl | yes | 11.78 | before_cleaning | controlled |
| 30.06.08 | 930 | Mar | no  | 5.11  | before_cleaning | controlled |
| 01.07.08 | 670 | Syl | yes | 8.1   | before_cleaning | controlled |
| 01.07.08 | 795 | Sun | no  | 10.4  | before_cleaning | controlled |
| 01.07.08 | 810 | Wal | yes | 6.19  | before_cleaning | controlled |
| 02.07.08 | 540 | Mar | no  | 11.27 | before_cleaning | controlled |
| 02.07.08 | 705 | Sun | no  | 24.3  | before_cleaning | controlled |
| 02.07.08 | 815 | Syl | yes | 37.55 | before_cleaning | controlled |
| 03.07.08 | 570 | Mar | no  | 10.9  | before_cleaning | controlled |
| 04.07.08 | 720 | Hay | yes | 8.34  | before_cleaning | free       |
| 04.07.08 | 793 | Sun | no  | 26.44 | before_cleaning | controlled |
| 04.07.08 | 910 | Syl | yes | 10.43 | before_cleaning | controlled |
| 07.07.08 | 510 | Wal | yes | 6.78  | before_cleaning | controlled |
| 07.07.08 | 535 | Pie | yes | 11.23 | before_cleaning | controlled |
| 07.07.08 | 540 | Mar | no  | 5.64  | before_cleaning | controlled |
| 07.07.08 | 645 | Syl | yes | 15.23 | before_cleaning | controlled |
| 07.07.08 | 795 | Tin | yes | 15.08 | before_cleaning | controlled |
| 08.07.08 | 510 | Wal | yes | 9     | before_cleaning | controlled |
| 08.07.08 | 510 | Mar | no  | 26.45 | before_cleaning | controlled |
| 08.07.08 | 765 | Syl | yes | 18.71 | before_cleaning | controlled |
| 09.07.08 | 510 | Wal | yes | 6.42  | before_cleaning | controlled |
| 09.07.08 | 665 | Pie | yes | 14.93 | after_cleaning  | controlled |
| 09.07.08 | 840 | Tin | yes | 12.54 | before_cleaning | controlled |
| 10.07.08 | 540 | Mar | no  | 15.7  | before_cleaning | controlled |
| 10.07.08 | 640 | Syl | yes | 18.35 | before_cleaning | controlled |
| 10.07.08 | 835 | Tin | yes | 24.94 | before_cleaning | controlled |
| 11.07.08 | 555 | Mar | no  | 13.98 | before_cleaning | controlled |

|          |     |     |     |       |                 |            |
|----------|-----|-----|-----|-------|-----------------|------------|
| 11.07.08 | 855 | Syl | yes | 12.72 | before_cleaning | controlled |
| 12.07.08 | 465 | Tin | yes | 13.7  | before_cleaning | controlled |
| 13.07.08 | 545 | Tin | yes | 26.4  | before_cleaning | controlled |
| 14.07.08 | 500 | Syl | yes | 16.6  | before_cleaning | controlled |
| 15.07.08 | 555 | Pie | yes | 18.43 | before_cleaning | controlled |
| 15.07.08 | 680 | Car | yes | 6.88  | before_cleaning | free       |
| 15.07.08 | 750 | Sun | no  | 9.2   | before_cleaning | controlled |
| 15.07.08 | 825 | Mar | no  | 8     | before_cleaning | controlled |
| 15.07.08 | 840 | Syl | yes | 13.85 | before_cleaning | controlled |
| 16.07.08 | 525 | Hay | yes | 12    | before_cleaning | free       |
| 16.07.08 | 580 | Car | yes | 8.67  | before_cleaning | free       |
| 16.07.08 | 640 | Tin | yes | 32.92 | before_cleaning | controlled |
| 17.07.08 | 540 | Hay | yes | 34.24 | before_cleaning | free       |
| 17.07.08 | 590 | Car | yes | 6.6   | before_cleaning | free       |
| 17.07.08 | 720 | Wal | yes | 5.46  | before_cleaning | controlled |
| 18.07.08 | 565 | Car | yes | 11.19 | before_cleaning | free       |
| 18.07.08 | 590 | Hay | yes | 17.99 | before_cleaning | free       |
| 18.07.08 | 765 | Tin | yes | 13.03 | before_cleaning | controlled |
| 21.07.08 | 580 | Pie | yes | 16.37 | before_cleaning | controlled |
| 21.07.08 | 735 | Mar | no  | 9.13  | before_cleaning | controlled |
| 21.07.08 | 780 | Hay | yes | 7.42  | before_cleaning | free       |
| 21.07.08 | 915 | Sun | no  | 9.1   | before_cleaning | controlled |
| 22.07.08 | 510 | Gra | no  | 6.83  | before_cleaning | controlled |
| 22.07.08 | 530 | Pie | yes | 19.25 | before_cleaning | controlled |
| 22.07.08 | 570 | Sun | no  | 14.81 | before_cleaning | controlled |
| 22.07.08 | 720 | Fer | no  | 11.01 | before_cleaning | controlled |
| 22.07.08 | 785 | Wal | yes | 4.24  | before_cleaning | controlled |
| 22.07.08 | 820 | Car | yes | 6.8   | before_cleaning | controlled |
| 22.07.08 | 840 | Edg | no  | 4.71  | before_cleaning | free       |
| 23.07.08 | 510 | Gra | no  | 29.75 | before_cleaning | controlled |
| 23.07.08 | 720 | Fer | no  | 33.75 | before_cleaning | controlled |
| 23.07.08 | 780 | Sun | no  | 17.52 | after_training  | controlled |
| 23.07.08 | 840 | Syl | yes | 18.35 | before_cleaning | controlled |
| 24.07.08 | 590 | Hay | yes | 5.62  | before_cleaning | free       |
| 24.07.08 | 660 | Edg | no  | 8.71  | before_cleaning | free       |
| 24.07.08 | 735 | Wal | yes | 6.54  | after_training  | controlled |
| 24.07.08 | 810 | Syl | yes | 28.3  | before_cleaning | controlled |
| 25.07.08 | 495 | Gra | no  | 27.23 | before_cleaning | controlled |
| 25.07.08 | 530 | Hay | yes | 7.83  | before_cleaning | free       |
| 25.07.08 | 630 | Car | yes | 8.25  | before_cleaning | controlled |
| 25.07.08 | 660 | Edg | no  | 9.88  | before_cleaning | free       |
| 25.07.08 | 675 | Sun | no  | 26.95 | before_cleaning | controlled |
| 25.07.08 | 850 | Luk | no  | 20.99 | before_cleaning | free       |
| 28.07.08 | 485 | Edg | no  | 6.88  | before_cleaning | free       |
| 28.07.08 | 500 | Luk | no  | 22.91 | before_cleaning | free       |

|          |      |     |     |       |                 |            |
|----------|------|-----|-----|-------|-----------------|------------|
| 28.07.08 | 560  | Tin | yes | 12.75 | before_cleaning | controlled |
| 28.07.08 | 725  | Wal | yes | 8.32  | after_training  | controlled |
| 28.07.08 | 775  | Hay | yes | 7.77  | before_cleaning | free       |
| 28.07.08 | 865  | Pie | yes | 14.67 | before_cleaning | controlled |
| 28.07.08 | 875  | Car | yes | 31.52 | after_cleaning  | controlled |
| 28.07.08 | 1050 | Mar | no  | 6.6   | before_cleaning | controlled |
| 29.07.08 | 490  | Edg | no  | 7.17  | before_cleaning | free       |
| 29.07.08 | 510  | Luk | no  | 19.12 | before_cleaning | free       |
| 29.07.08 | 610  | Mar | no  | 6.54  | before_cleaning | controlled |
| 29.07.08 | 570  | Tin | yes | 13.37 | after_cleaning  | controlled |
| 30.07.08 | 490  | Edg | no  | 12.16 | before_cleaning | free       |
| 30.07.08 | 525  | Pie | yes | 35.99 | before_cleaning | controlled |
| 30.07.08 | 590  | Car | yes | 15.54 | before_cleaning | controlled |
| 30.07.08 | 840  | Tin | yes | 12.02 | before_cleaning | controlled |
| 30.07.08 | 870  | Syl | yes | 13.48 | before_cleaning | free       |
| 30.07.08 | 890  | Sun | no  | 15.46 | after_training  | controlled |
| 30.07.08 | 965  | Hay | yes | 4.22  | before_cleaning | free       |
| 31.07.08 | 495  | Edg | no  | 7.49  | before_cleaning | free       |
| 31.07.08 | 510  | Tin | yes | 22.76 | before_cleaning | controlled |
| 31.07.08 | 575  | Mar | no  | 9.88  | before_cleaning | controlled |
| 31.07.08 | 810  | Car | yes | 11.95 | after_cleaning  | controlled |
| 31.07.08 | 900  | Sun | no  | 4.3   | before_cleaning | controlled |
| 01.08.08 | 480  | Edg | no  | 8.9   | before_cleaning | free       |
| 01.08.08 | 510  | Tin | yes | 17.74 | before_cleaning | controlled |
| 01.08.08 | 570  | Sun | no  | 24.52 | before_cleaning | controlled |
| 01.08.08 | 570  | Wal | yes | 5.35  | after_cleaning  | controlled |
| 01.08.08 | 815  | Car | yes | 10.51 | after_cleaning  | controlled |
| 01.08.08 | 960  | Fer | no  | 7.86  | before_cleaning | controlled |
| 01.08.08 | 1180 | Hay | yes | 1.51  | before_cleaning | free       |
| 03.08.08 | 480  | Fer | no  | 33.81 | before_cleaning | controlled |
| 04.08.08 | 760  | Sun | no  | 9.3   | after_training  | controlled |
| 04.08.08 | 855  | Tin | yes | 12.35 | before_cleaning | controlled |
| 05.08.08 | 500  | Tin | yes | 11.66 | before_cleaning | controlled |
| 05.08.08 | 735  | Pie | yes | 21.81 | before_cleaning | controlled |
| 05.08.08 | 820  | Car | yes | 9.19  | after_cleaning  | controlled |
| 05.08.08 | 850  | Edg | no  | 3.92  | before_cleaning | free       |
| 05.08.08 | 900  | Sun | no  | 6.91  | after_training  | controlled |
| 06.08.08 | 680  | Wal | yes | 6.41  | after_training  | controlled |
| 06.08.08 | 815  | Car | yes | 7.12  | after_cleaning  | controlled |
| 06.08.08 | 825  | Sun | no  | 5.03  | after_training  | controlled |
| 07.08.08 | 680  | Sun | no  | 12.4  | after_training  | controlled |
| 07.08.08 | 1010 | Wal | yes | 4.62  | after_training  | controlled |
| 08.08.08 | 550  | Hay | yes | 6.74  | before_cleaning | free       |
| 08.08.08 | 960  | Wal | yes | 6.43  | after_training  | controlled |
| 11.08.08 | 800  | Wal | yes | 6.03  | after_training  | controlled |

|          |      |     |     |       |                 |            |
|----------|------|-----|-----|-------|-----------------|------------|
| 11.08.08 | 840  | Sun | no  | 13.24 | after_training  | controlled |
| 12.08.08 | 600  | Fer | no  | 34.46 | before_cleaning | controlled |
| 12.08.08 | 765  | Sun | no  | 10.88 | after_training  | controlled |
| 12.08.08 | 950  | Wal | yes | 6.51  | after_training  | controlled |
| 13.08.08 | 820  | Sun | no  | 15.12 | after_training  | controlled |
| 14.08.08 | 660  | Sun | no  | 19.36 | after_training  | controlled |
| 14.08.08 | 850  | Car | yes | 5.98  | before_cleaning | controlled |
| 15.08.08 | 440  | Car | yes | 12.99 | before_cleaning | controlled |
| 15.08.08 | 780  | Sun | no  | 21.51 | after_training  | controlled |
| 18.08.08 | 870  | Sun | no  | 20.75 | after_training  | controlled |
| 19.08.08 | 730  | Sun | no  | 16.75 | after_training  | controlled |
| 19.08.08 | 900  | Wal | yes | 10.34 | after_training  | controlled |
| 20.08.08 | 695  | Sun | no  | 26.87 | after_training  | controlled |
| 20.08.08 | 915  | Wal | yes | 8.42  | after_training  | controlled |
| 21.08.08 | 720  | Sun | no  | 22.25 | after_training  | controlled |
| 21.08.08 | 905  | Wal | yes | 5.06  | after_training  | controlled |
| 21.08.08 | 930  | Gra | no  | 13.88 | before_cleaning | controlled |
| 22.08.08 | 690  | Sun | no  | 14.04 | after_training  | controlled |
| 25.08.08 | 805  | Hay | yes | 4.29  | before_cleaning | free       |
| 26.08.08 | 680  | Sun | no  | 28.41 | after_training  | controlled |
| 26.08.08 | 910  | Wal | yes | 4.5   | after_training  | controlled |
| 29.08.08 | 545  | Gra | no  | 4.9   | before_cleaning | controlled |
| 01.09.08 | 470  | Hay | yes | 6.1   | after_cleaning  | free       |
| 01.09.08 | 870  | Gra | no  | 8.55  | after_training  | controlled |
| 01.09.08 | 885  | Wal | yes | 7.8   | after_training  | controlled |
| 02.09.08 | 940  | Wal | yes | 12.54 | after_training  | controlled |
| 03.09.08 | 610  | Sun | no  | 10.14 | after_training  | controlled |
| 03.09.08 | 860  | Edg | no  | 6.66  | before_cleaning | free       |
| 03.09.08 | 960  | Wal | yes | 10.65 | after_training  | controlled |
| 04.09.08 | 585  | Tin | yes | 16.6  | after_cleaning  | free       |
| 04.09.08 | 660  | Sun | no  | 16.29 | after_training  | controlled |
| 04.09.08 | 965  | Wal | yes | 8.09  | after_training  | controlled |
| 05.09.08 | 570  | Tin | yes | 4.37  | before_cleaning | free       |
| 08.09.08 | 735  | Wal | yes | 9.47  | after_training  | controlled |
| 08.09.08 | 855  | Sun | no  | 12.92 | after_training  | controlled |
| 09.09.08 | 655  | Sun | no  | 7.95  | after_training  | controlled |
| 10.09.08 | 870  | Sun | no  | 6.36  | after_training  | controlled |
| 10.09.08 | 1065 | Pie | yes | 3.35  | before_cleaning | free       |
| 11.09.08 | 825  | Car | yes | 10.45 | before_cleaning | free       |
| 14.09.08 | 810  | Car | yes | 16.2  | before_cleaning | controlled |
| 15.09.08 | 840  | Tin | yes | 10.49 | after_cleaning  | free       |
| 15.09.08 | 840  | Gra | no  | 29.76 | before_cleaning | controlled |
| 15.09.08 | 940  | Wal | yes | 4.6   | after_training  | controlled |
| 16.09.08 | 630  | Wal | yes | 5.34  | after_training  | controlled |
| 16.09.08 | 835  | Tin | yes | 21.17 | after_cleaning  | free       |

|          |      |     |     |       |                 |            |
|----------|------|-----|-----|-------|-----------------|------------|
| 19.09.08 | 920  | Tin | yes | 19.88 | after_cleaning  | free       |
| 22.09.08 | 685  | Wal | yes | 7.84  | after_training  | controlled |
| 23.09.08 | 630  | Wal | yes | 9.23  | after_training  | controlled |
| 24.09.08 | 690  | Fer | no  | 23.38 | before_cleaning | controlled |
| 25.09.08 | 900  | Gra | no  | 33.23 | after_training  | controlled |
| 26.09.08 | 900  | Gra | no  | 32.73 | after_training  | controlled |
| 29.09.08 | 745  | Fer | no  | 21.29 | after_training  | controlled |
| 30.09.08 | 990  | Fer | no  | 22.53 | after_training  | controlled |
| 01.10.08 | 600  | Nic | yes | 9.59  | before_cleaning | free       |
| 01.10.08 | 980  | Fer | no  | 22.55 | after_training  | controlled |
| 02.10.08 | 690  | Fer | no  | 33.24 | after_training  | controlled |
| 02.10.08 | 725  | Nic | yes | 7.17  | before_cleaning | free       |
| 03.10.08 | 535  | Pie | yes | 8.96  | after_cleaning  | free       |
| 04.10.08 | 530  | Fer | no  | 22.39 | before_cleaning | controlled |
| 05.10.08 | 690  | Fer | no  | 8.93  | after_training  | controlled |
| 07.10.08 | 960  | Fer | no  | 11.73 | after_training  | controlled |
| 08.10.08 | 1050 | Fer | no  | 4.19  | after_training  | controlled |
| 09.10.08 | 930  | Fer | no  | 10.5  | after_training  | controlled |
| 10.10.08 | 960  | Fer | no  | 7.83  | after_training  | controlled |
| 13.10.08 | 570  | Wal | yes | 5.48  | before_cleaning | free       |
| 13.10.08 | 620  | Sun | no  | 12.2  | after_training  | controlled |
| 13.10.08 | 635  | Fer | no  | 3.87  | before_cleaning | controlled |
| 13.10.08 | 645  | Nic | yes | 14.86 | before_cleaning | free       |
| 13.10.08 | 870  | Hay | yes | 4.7   | before_cleaning | free       |
| 14.10.08 | 585  | Wal | yes | 8.65  | after_cleaning  | free       |
| 14.10.08 | 615  | Nic | yes | 18.03 | before_cleaning | free       |
| 14.10.08 | 900  | Sun | no  | 22.4  | after_training  | controlled |
| 15.10.08 | 550  | Gra | no  | 38.69 | before_cleaning | controlled |
| 15.10.08 | 630  | Wal | yes | 7.1   | before_cleaning | free       |
| 15.10.08 | 740  | Nic | yes | 19.51 | after_cleaning  | free       |
| 15.10.08 | 860  | Hay | yes | 5     | before_cleaning | free       |
| 16.10.08 | 480  | Wal | yes | 8.64  | before_cleaning | free       |
| 16.10.08 | 805  | Gra | no  | 28.62 | before_cleaning | controlled |
| 17.10.08 | 1020 | Hay | yes | 4.53  | before_cleaning | free       |
| 20.10.08 | 500  | Car | yes | 18.52 | before_cleaning | controlled |
| 20.10.08 | 690  | Fer | no  | 29.23 | after_training  | controlled |
| 20.10.08 | 780  | Nic | yes | 10.95 | before_cleaning | free       |
| 21.10.08 | 505  | Car | yes | 18.32 | before_cleaning | controlled |
| 21.10.08 | 600  | Nic | yes | 12.28 | after_cleaning  | free       |
| 21.10.08 | 700  | Sun | no  | 15.57 | after_training  | controlled |
| 21.10.08 | 720  | Fer | no  | 18.41 | after_training  | controlled |
| 22.10.08 | 500  | Car | yes | 22.19 | before_cleaning | controlled |
| 22.10.08 | 620  | Nic | yes | 10.18 | before_cleaning | free       |
| 22.10.08 | 780  | Fer | no  | 22.67 | after_training  | controlled |
| 22.10.08 | 950  | Sun | no  | 14.17 | after_training  | controlled |

|          |     |     |     |       |                 |            |
|----------|-----|-----|-----|-------|-----------------|------------|
| 23.10.08 | 500 | Car | yes | 13.99 | before_cleaning | controlled |
| 23.10.08 | 585 | Sun | no  | 24.65 | after_training  | controlled |
| 23.10.08 | 825 | Fer | no  | 34    | after_training  | controlled |
| 23.10.08 | 840 | Wal | yes | 8.45  | after_cleaning  | free       |
| 24.10.08 | 500 | Car | yes | 17.19 | before_cleaning | controlled |
| 24.10.08 | 910 | Hay | yes | 3.44  | before_cleaning | free       |
| 24.10.08 | 930 | Fer | no  | 27.78 | after_training  | controlled |
| 27.10.08 | 600 | Wal | yes | 10.47 | after_cleaning  | free       |
| 27.10.08 | 620 | Hay | yes | 4.5   | before_cleaning | controlled |
| 27.10.08 | 625 | Tin | yes | 15.68 | after_cleaning  | free       |
| 28.10.08 | 520 | Fer | no  | 18.57 | before_cleaning | controlled |
| 28.10.08 | 560 | Wal | yes | 8.81  | after_cleaning  | controlled |
| 28.10.08 | 690 | Sun | no  | 14.26 | before_cleaning | controlled |
| 28.10.08 | 840 | Nic | yes | 30.52 | before_cleaning | controlled |
| 28.10.08 | 855 | Tin | yes | 8.8   | after_cleaning  | free       |
| 29.10.08 | 505 | Tin | yes | 24.93 | after_cleaning  | free       |
| 29.10.08 | 575 | Sun | no  | 17.01 | before_cleaning | controlled |
| 29.10.08 | 660 | Fer | no  | 28.68 | before_cleaning | controlled |
| 29.10.08 | 800 | Wal | yes | 15.52 | after_training  | controlled |
| 30.10.08 | 785 | Tin | yes | 9.49  | after_cleaning  | free       |
| 30.10.08 | 825 | Wal | yes | 5.38  | after_training  | controlled |
| 03.11.08 | 685 | Car | yes | 11.25 | before_cleaning | controlled |
| 03.11.08 | 770 | Hay | yes | 6.67  | before_cleaning | controlled |
| 04.11.08 | 480 | Car | yes | 12.39 | before_cleaning | controlled |
| 04.11.08 | 560 | Nic | yes | 8.52  | after_cleaning  | free       |
| 04.11.08 | 640 | Sun | no  | 6.78  | before_cleaning | controlled |
| 05.11.08 | 565 | Sun | no  | 7.41  | before_cleaning | controlled |
| 05.11.08 | 710 | Car | yes | 15.66 | before_cleaning | controlled |
| 06.11.08 | 505 | Car | yes | 14.55 | before_cleaning | controlled |
| 06.11.08 | 650 | Sun | no  | 16.16 | after_training  | controlled |
| 06.11.08 | 840 | Syl | yes | 4.24  | before_cleaning | controlled |
| 06.11.08 | 885 | Tin | yes | 7.05  | after_cleaning  | controlled |
| 07.11.08 | 500 | Car | yes | 13    | before_cleaning | controlled |
| 07.11.08 | 820 | Sun | no  | 9.07  | before_cleaning | controlled |
| 07.11.08 | 900 | Hay | yes | 3.35  | after_cleaning  | free       |
| 10.11.08 | 765 | Syl | yes | 9.39  | before_cleaning | controlled |
| 10.11.08 | 840 | Hay | yes | 2.75  | before_cleaning | free       |
| 11.11.08 | 665 | Sun | no  | 6.87  | before_cleaning | controlled |
| 12.11.08 | 555 | Sun | no  | 10.61 | before_cleaning | controlled |
| 12.11.08 | 585 | Fer | no  | 5.6   | before_cleaning | free       |
| 12.11.08 | 845 | Syl | yes | 7.88  | before_cleaning | controlled |
| 13.11.08 | 540 | Wal | yes | 6.05  | after_cleaning  | free       |
| 13.11.08 | 590 | Fer | no  | 12.32 | before_cleaning | free       |
| 14.11.08 | 620 | Nic | yes | 16.09 | after_cleaning  | free       |
| 14.11.08 | 750 | Sun | no  | 16.92 | before_cleaning | controlled |

|          |     |     |     |       |                 |            |
|----------|-----|-----|-----|-------|-----------------|------------|
| 14.11.08 | 820 | Wal | yes | 6.97  | after_cleaning  | free       |
| 17.11.08 | 660 | Nic | yes | 4.52  | after_cleaning  | free       |
| 17.11.08 | 660 | Fer | no  | 4.49  | before_cleaning | controlled |
| 17.11.08 | 740 | Wal | yes | 8.6   | after_cleaning  | free       |
| 17.11.08 | 980 | Syl | yes | 5.65  | before_cleaning | free       |
| 18.11.08 | 590 | Wal | yes | 10.93 | after_cleaning  | free       |
| 18.11.08 | 645 | Sun | no  | 18.33 | before_cleaning | controlled |
| 18.11.08 | 720 | Nic | yes | 12.79 | after_cleaning  | free       |
| 18.11.08 | 940 | Syl | yes | 9.67  | before_cleaning | free       |
| 19.11.08 | 600 | Sun | no  | 6.37  | before_cleaning | controlled |
| 19.11.08 | 630 | Sam | no  | 8.57  | after_training  | controlled |
| 19.11.08 | 650 | Fer | no  | 8.16  | before_cleaning | controlled |
| 19.11.08 | 830 | Car | yes | 7.23  | after_cleaning  | controlled |
| 20.11.08 | 510 | Syl | yes | 23.97 | before_cleaning | free       |
| 20.11.08 | 585 | Fer | no  | 7.97  | before_cleaning | controlled |
| 20.11.08 | 780 | Wal | yes | 8.4   | after_cleaning  | free       |
| 20.11.08 | 900 | Nic | yes | 15.67 | after_cleaning  | free       |
| 21.11.08 | 600 | Wal | yes | 9.13  | after_cleaning  | free       |
| 21.11.08 | 750 | Nic | yes | 10    | after_cleaning  | free       |
| 24.11.08 | 520 | Hay | yes | 3.49  | after_training  | controlled |
| 25.11.08 | 600 | Fer | no  | 19.09 | before_cleaning | controlled |
| 26.11.08 | 570 | Syl | yes | 18.72 | after_cleaning  | free       |
| 27.11.08 | 590 | Syl | yes | 13.33 | after_cleaning  | free       |
| 27.11.08 | 820 | Car | yes | 11.7  | after_cleaning  | controlled |
| 28.11.08 | 675 | Syl | yes | 13.35 | after_cleaning  | free       |
| 28.11.08 | 810 | Car | yes | 10.04 | after_cleaning  | controlled |
| 01.12.08 | 590 | Fer | no  | 9.98  | before_cleaning | controlled |
| 01.12.08 | 785 | Wal | yes | 11.31 | after_cleaning  | free       |
| 02.12.08 | 550 | Nic | yes | 22.54 | after_cleaning  | free       |
| 02.12.08 | 635 | Sun | no  | 12.23 | before_cleaning | controlled |
| 02.12.08 | 725 | Tin | yes | 32.95 | before_cleaning | controlled |
| 02.12.08 | 870 | Fer | no  | 7.28  | before_cleaning | controlled |
| 03.12.08 | 555 | Sun | no  | 10.87 | before_cleaning | controlled |
| 04.12.08 | 540 | Sun | no  | 7.24  | before_cleaning | controlled |
| 04.12.08 | 610 | Fer | no  | 27.19 | before_cleaning | controlled |
| 04.12.08 | 720 | Tin | yes | 19.86 | before_cleaning | controlled |
| 05.12.08 | 510 | Sun | no  | 7.29  | before_cleaning | controlled |
| 05.12.08 | 600 | Fer | no  | 37.05 | before_cleaning | controlled |
| 05.12.08 | 750 | Tin | yes | 29.55 | before_cleaning | controlled |
| 08.12.08 | 810 | Fer | no  | 24.84 | before_cleaning | controlled |
| 08.12.08 | 870 | Wal | yes | 9.06  | after_training  | controlled |
| 09.12.08 | 645 | Sun | no  | 9.96  | before_cleaning | controlled |
| 09.12.08 | 765 | Car | yes | 12.53 | before_cleaning | controlled |
| 09.12.08 | 895 | Wal | yes | 7.41  | after_cleaning  | controlled |
| 10.12.08 | 540 | Sun | no  | 6.73  | before_cleaning | controlled |



|          |      |     |     |       |                 |            |
|----------|------|-----|-----|-------|-----------------|------------|
| 10.12.08 | 765  | Car | yes | 10.6  | before_cleaning | controlled |
| 10.12.08 | 860  | Syl | yes | 10.22 | after_cleaning  | free       |
| 11.12.08 | 560  | Sun | no  | 7.35  | after_training  | controlled |
| 12.12.08 | 770  | Sun | no  | 9.99  | before_cleaning | controlled |
| 15.12.08 | 570  | Sun | no  | 6.39  | before_cleaning | controlled |
| 15.12.08 | 625  | Wal | yes | 13.21 | after_training  | controlled |
| 15.12.08 | 920  | Fer | no  | 15.14 | after_training  | controlled |
| 16.12.08 | 660  | Sun | no  | 7.91  | before_cleaning | controlled |
| 16.12.08 | 705  | Syl | yes | 14    | after_cleaning  | free       |
| 16.12.08 | 780  | Car | yes | 7.04  | before_cleaning | controlled |
| 16.12.08 | 1005 | Fer | no  | 13.05 | after_training  | controlled |
| 17.12.08 | 600  | Sun | no  | 5.95  | after_training  | controlled |
| 17.12.08 | 655  | Syl | yes | 14.57 | after_cleaning  | free       |
| 17.12.08 | 780  | Car | yes | 7.64  | before_cleaning | controlled |
| 17.12.08 | 1000 | Fer | no  | 5.67  | after_training  | controlled |
| 18.12.08 | 640  | Sun | no  | 8.32  | after_training  | controlled |
| 18.12.08 | 660  | Syl | yes | 14.44 | after_cleaning  | free       |
| 18.12.08 | 985  | Fer | no  | 5.5   | after_training  | controlled |
| 19.12.08 | 600  | Sun | no  | 5.74  | after_training  | controlled |
| 19.12.08 | 695  | Fer | no  | 15.7  | after_training  | controlled |
| 22.12.08 | 670  | Tin | yes | 10.95 | before_cleaning | free       |
| 22.12.08 | 690  | Sun | no  | 4.64  | before_cleaning | free       |
| 22.12.08 | 750  | Pie | yes | 7.94  | after_cleaning  | free       |
| 22.12.08 | 765  | Syl | yes | 11.2  | after_cleaning  | free       |
| 23.12.08 | 690  | Tin | yes | 9.39  | after_cleaning  | free       |
| 24.12.08 | 550  | Car | yes | 6.52  | before_cleaning | free       |
| 24.12.08 | 565  | Tin | yes | 6.59  | after_cleaning  | free       |
| 24.12.08 | 610  | Hay | yes | 2.37  | before_cleaning | free       |
| 24.12.08 | 796  | Zor | no  | 14.47 | before_cleaning | free       |
| 25.12.08 | 720  | Zor | no  | 6.3   | before_cleaning | free       |
| 26.12.08 | 510  | Pie | yes | 10.63 | after_cleaning  | free       |
| 26.12.08 | 550  | Tin | yes | 4.66  | after_cleaning  | free       |
| 26.12.08 | 726  | Zor | no  | 5.93  | before_cleaning | free       |
| 27.12.08 | 690  | Car | yes | 6.01  | before_cleaning | free       |
| 27.12.08 | 740  | Hay | yes | 1.79  | before_cleaning | free       |
| 27.12.08 | 810  | Zor | no  | 2.83  | before_cleaning | free       |
| 27.12.08 | 810  | Syl | yes | 7.06  | after_cleaning  | free       |
| 27.12.08 | 840  | Fer | no  | 3.87  | before_cleaning | free       |
| 29.12.08 | 545  | Hay | yes | 6.47  | after_cleaning  | free       |
| 29.12.08 | 595  | Car | yes | 17.58 | after_cleaning  | free       |
| 29.12.08 | 600  | Fer | no  | 2.92  | before_cleaning | controlled |
| 29.12.08 | 645  | Pie | yes | 11.88 | after_cleaning  | free       |
| 30.12.08 | 625  | Zor | no  | 25.7  | before_cleaning | free       |
| 30.12.08 | 640  | Tin | yes | 17.69 | before_cleaning | free       |
| 30.12.08 | 750  | Pie | yes | 14.99 | after_cleaning  | free       |

|          |     |     |     |       |                 |            |
|----------|-----|-----|-----|-------|-----------------|------------|
| 30.12.08 | 850 | Fer | no  | 5.23  | before_cleaning | controlled |
| 31.12.08 | 540 | Hay | yes | 4.55  | after_cleaning  | free       |
| 31.12.08 | 600 | Car | yes | 13.41 | after_cleaning  | free       |
| 02.01.09 | 540 | Syl | yes | 5.85  | before_cleaning | free       |
| 02.01.09 | 600 | Car | yes | 18.86 | after_cleaning  | free       |
| 02.01.09 | 670 | Pie | yes | 6.79  | after_cleaning  | free       |
| 02.01.09 | 690 | Fer | no  | 2.17  | before_cleaning | free       |
| 02.01.09 | 750 | Tin | yes | 7.76  | after_cleaning  | free       |
| 02.01.09 | 795 | Zor | no  | 14.17 | before_cleaning | free       |
| 05.01.09 | 560 | Hay | yes | 3.33  | after_cleaning  | free       |
| 05.01.09 | 575 | Syl | yes | 18.74 | after_cleaning  | free       |
| 05.01.09 | 750 | Zor | no  | 12.47 | before_cleaning | free       |
| 05.01.09 | 765 | Tin | yes | 4.44  | after_cleaning  | free       |
| 06.01.09 | 510 | Car | yes | 6.09  | after_cleaning  | free       |
| 06.01.09 | 520 | Tin | yes | 11.86 | after_cleaning  | free       |
| 06.01.09 | 545 | Nic | yes | 9.84  | after_cleaning  | free       |
| 06.01.09 | 600 | Sun | no  | 5.2   | before_cleaning | controlled |
| 06.01.09 | 635 | Zor | no  | 11.16 | before_cleaning | free       |
| 06.01.09 | 635 | Syl | yes | 12.71 | after_cleaning  | free       |
| 06.01.09 | 720 | Fer | no  | 4.59  | before_cleaning | free       |
| 06.01.09 | 780 | Wal | yes | 8.45  | after_cleaning  | free       |
| 07.01.09 | 530 | Sun | no  | 12.53 | before_cleaning | controlled |
| 07.01.09 | 540 | Syl | yes | 18.32 | after_cleaning  | free       |
| 07.01.09 | 780 | Nic | yes | 9.75  | after_cleaning  | free       |
| 07.01.09 | 825 | Fer | no  | 1.89  | before_cleaning | free       |
| 07.01.09 | 835 | Wal | yes | 6.87  | after_cleaning  | free       |
| 08.01.09 | 510 | Hay | yes | 7.69  | before_cleaning | free       |
| 08.01.09 | 550 | Sun | no  | 6.02  | after_training  | controlled |
| 08.01.09 | 575 | Fer | no  | 3.78  | before_cleaning | free       |
| 08.01.09 | 585 | Nic | yes | 10.51 | after_cleaning  | free       |
| 08.01.09 | 615 | Wal | yes | 4.44  | before_cleaning | free       |
| 08.01.09 | 645 | Wal | yes | 12.12 | after_cleaning  | free       |
| 08.01.09 | 645 | Pie | yes | 10.58 | after_cleaning  | free       |
| 08.01.09 | 670 | Syl | yes | 9.56  | after_cleaning  | free       |
| 08.01.09 | 743 | Zor | no  | 6.85  | before_cleaning | free       |
| 08.01.09 | 830 | Tin | yes | 4.41  | after_cleaning  | free       |
| 09.01.09 | 530 | Nic | yes | 13.16 | after_cleaning  | free       |
| 09.01.09 | 670 | Hay | yes | 6.95  | after_cleaning  | free       |
| 09.01.09 | 680 | Sun | no  | 10.3  | before_cleaning | controlled |
| 09.01.09 | 720 | Pie | yes | 9.67  | after_cleaning  | free       |
| 09.01.09 | 720 | Syl | yes | 10.03 | after_cleaning  | free       |
| 09.01.09 | 795 | Tin | yes | 10.38 | after_cleaning  | free       |
| 09.01.09 | 840 | Car | yes | 8.81  | after_cleaning  | free       |
| 12.01.09 | 735 | Wal | yes | 13.08 | after_training  | controlled |
| 12.01.09 | 742 | Zor | no  | 8.38  | before_cleaning | free       |

|          |     |     |     |       |                 |            |
|----------|-----|-----|-----|-------|-----------------|------------|
| 12.01.09 | 740 | Syl | yes | 15.13 | after_cleaning  | free       |
| 12.01.09 | 755 | Nic | yes | 31.75 | before_cleaning | controlled |
| 12.01.09 | 795 | Hay | yes | 4.43  | before_cleaning | free       |
| 12.01.09 | 805 | Fer | no  | 6.98  | before_cleaning | controlled |
| 12.01.09 | 840 | Edg | no  | 5.06  | before_cleaning | free       |
| 12.01.09 | 860 | Luk | no  | 10.72 | before_cleaning | free       |
| 13.01.09 | 650 | Syl | yes | 13.9  | after_cleaning  | free       |
| 13.01.09 | 720 | Hay | yes | 3.83  | before_cleaning | free       |
| 13.01.09 | 745 | Wal | yes | 5.47  | before_cleaning | controlled |
| 13.01.09 | 765 | Tin | yes | 27.9  | before_cleaning | controlled |
| 13.01.09 | 840 | Edg | no  | 6.42  | before_cleaning | free       |
| 13.01.09 | 880 | Luk | no  | 11.58 | before_cleaning | free       |
| 14.01.09 | 570 | Syl | yes | 10.37 | after_cleaning  | free       |
| 14.01.09 | 645 | Sun | no  | 15.15 | after_training  | controlled |
| 14.01.09 | 795 | Nic | yes | 12.87 | before_cleaning | controlled |
| 14.01.09 | 805 | Fer | no  | 8.75  | before_cleaning | controlled |
| 15.01.09 | 600 | Sun | no  | 9.9   | after_training  | controlled |
| 15.01.09 | 590 | Fer | no  | 10.13 | before_cleaning | controlled |
| 15.01.09 | 630 | Syl | yes | 14.57 | after_cleaning  | free       |
| 15.01.09 | 735 | Hay | yes | 12.93 | before_cleaning | free       |
| 15.01.09 | 746 | Nic | yes | 10.75 | before_cleaning | controlled |
| 15.01.09 | 747 | Wal | yes | 8.03  | before_cleaning | controlled |
| 15.01.09 | 757 | Zor | no  | 4.56  | before_cleaning | free       |
| 16.01.09 | 575 | Syl | yes | 11.5  | after_cleaning  | free       |
| 16.01.09 | 690 | Sun | no  | 9.17  | after_training  | controlled |
| 16.01.09 | 735 | Nic | yes | 6.68  | before_cleaning | controlled |
| 16.01.09 | 735 | Wal | yes | 3.16  | before_cleaning | controlled |
| 16.01.09 | 975 | Zor | no  | 3.07  | before_cleaning | free       |
| 16.01.09 | 975 | Hay | yes | 3.34  | before_cleaning | free       |
| 17.01.09 | 540 | Fer | no  | 9.4   | before_cleaning | controlled |
| 18.01.09 | 540 | Fer | no  | 7.96  | before_cleaning | controlled |
| 19.01.09 | 685 | Sun | no  | 18.08 | after_training  | controlled |
| 19.01.09 | 695 | Syl | yes | 22.54 | after_cleaning  | free       |
| 19.01.09 | 725 | Wal | yes | 11.56 | after_training  | controlled |
| 19.01.09 | 840 | Hay | yes | 5.51  | before_cleaning | free       |
| 20.01.09 | 560 | Fer | no  | 15.99 | after_training  | controlled |
| 20.01.09 | 720 | Sun | no  | 5.95  | after_training  | controlled |
| 20.01.09 | 860 | Zor | no  | 2.83  | before_cleaning | free       |
| 21.01.09 | 615 | Sun | no  | 6.63  | after_training  | controlled |
| 21.01.09 | 820 | Hay | yes | 4.33  | before_cleaning | free       |
| 22.01.09 | 650 | Syl | yes | 10.61 | after_cleaning  | free       |
| 22.01.09 | 690 | Sun | no  | 9.06  | after_training  | controlled |
| 22.01.09 | 795 | Fer | no  | 27.58 | before_cleaning | controlled |
| 22.01.09 | 585 | Zor | no  | 11.62 | before_cleaning | free       |
| 23.01.09 | 590 | Fer | no  | 19.66 | before_cleaning | controlled |

|          |     |     |     |       |                 |            |
|----------|-----|-----|-----|-------|-----------------|------------|
| 23.01.09 | 615 | Syl | yes | 10.68 | after_cleaning  | free       |
| 23.01.09 | 780 | Sun | no  | 6.99  | before_cleaning | controlled |
| 23.01.09 | 820 | Hay | yes | 2.61  | before_cleaning | free       |
| 25.01.09 | 790 | Zor | no  | 3.8   | before_cleaning | free       |
| 26.01.09 | 700 | Car | yes | 15.19 | after_cleaning  | free       |
| 26.01.09 | 715 | Syl | yes | 14.81 | after_cleaning  | free       |
| 26.01.09 | 720 | Pie | yes | 12.2  | after_cleaning  | free       |
| 26.01.09 | 740 | Wal | yes | 4.65  | before_cleaning | controlled |
| 26.01.09 | 755 | Nic | yes | 12.72 | before_cleaning | free       |
| 26.01.09 | 770 | Zor | no  | 5.89  | before_cleaning | free       |
| 26.01.09 | 810 | Sun | no  | 5.97  | before_cleaning | free       |
| 26.01.09 | 870 | Hay | yes | 4.49  | before_cleaning | free       |
| 27.01.09 | 600 | Syl | yes | 15.13 | after_cleaning  | free       |
| 27.01.09 | 665 | Sun | no  | 5.4   | before_cleaning | free       |
| 27.01.09 | 725 | Car | yes | 11.5  | before_cleaning | controlled |
| 27.01.09 | 731 | Wal | yes | 4.55  | before_cleaning | controlled |
| 27.01.09 | 749 | Nic | yes | 6.85  | before_cleaning | free       |
| 28.01.09 | 580 | Fer | no  | 12.03 | before_cleaning | controlled |
| 28.01.09 | 630 | Pie | yes | 12.34 | after_cleaning  | free       |
| 28.01.09 | 730 | Zor | no  | 5.6   | before_cleaning | free       |
| 29.01.09 | 810 | Car | yes | 12.76 | before_cleaning | controlled |
| 30.01.09 | 630 | Pie | yes | 19.64 | after_cleaning  | free       |
| 30.01.09 | 720 | Syl | yes | 13.17 | after_cleaning  | free       |
| 30.01.09 | 795 | Car | yes | 7.46  | before_cleaning | controlled |
| 31.01.09 | 460 | Fer | no  | 13.49 | before_cleaning | controlled |
| 01.02.09 | 580 | Fer | no  | 9.15  | before_cleaning | controlled |
| 02.02.09 | 645 | Syl | yes | 18.88 | after_cleaning  | free       |
| 02.02.09 | 710 | Hay | yes | 8.64  | after_cleaning  | controlled |
| 02.02.09 | 710 | Sun | no  | 10.61 | after_training  | controlled |
| 02.02.09 | 716 | Wal | yes | 12.84 | before_cleaning | controlled |
| 02.02.09 | 840 | Edg | no  | 9.42  | before_cleaning | free       |
| 02.02.09 | 760 | Tin | yes | 14.15 | after_cleaning  | controlled |
| 02.02.09 | 760 | Nic | yes | 19.63 | after_cleaning  | free       |
| 03.02.09 | 680 | Sun | no  | 8.3   | after_training  | controlled |
| 03.02.09 | 690 | Zor | no  | 7.9   | before_cleaning | free       |
| 03.02.09 | 800 | Car | yes | 8.65  | before_cleaning | controlled |
| 03.02.09 | 820 | Wal | yes | 6.2   | before_cleaning | controlled |
| 03.02.09 | 840 | Edg | no  | 13.88 | before_cleaning | free       |
| 03.02.09 | 850 | Luk | no  | 10.64 | before_cleaning | free       |
| 04.02.09 | 700 | Sun | no  | 7.21  | after_training  | controlled |
| 04.02.09 | 770 | Tin | yes | 12.11 | before_cleaning | controlled |
| 04.02.09 | 800 | Car | yes | 7.66  | before_cleaning | controlled |
| 04.02.09 | 815 | Fer | no  | 4.57  | before_cleaning | controlled |
| 04.02.09 | 820 | Syl | yes | 9.48  | after_cleaning  | controlled |
| 04.02.09 | 870 | Edg | no  | 9.16  | before_cleaning | free       |

|          |     |     |     |       |                 |            |
|----------|-----|-----|-----|-------|-----------------|------------|
| 04.02.09 | 880 | Luk | no  | 8.49  | before_cleaning | free       |
| 05.02.09 | 645 | Fer | no  | 8.46  | before_cleaning | controlled |
| 05.02.09 | 780 | Tin | yes | 19.46 | before_cleaning | controlled |
| 05.02.09 | 805 | Car | yes | 8.56  | before_cleaning | controlled |
| 05.02.09 | 819 | Syl | yes | 12.47 | after_cleaning  | controlled |
| 05.02.09 | 675 | Sun | no  | 12.4  | after_training  | controlled |
| 06.02.09 | 810 | Edg | no  | 11.27 | before_cleaning | free       |
| 06.02.09 | 820 | Car | yes | 9.36  | before_cleaning | controlled |
| 06.02.09 | 860 | Pie | yes | 24.44 | after_cleaning  | free       |
| 09.02.09 | 550 | Hay | yes | 10.37 | after_cleaning  | free       |
| 09.02.09 | 640 | Fer | no  | 3.52  | before_cleaning | controlled |
| 09.02.09 | 705 | Sun | no  | 5.13  | after_training  | controlled |
| 09.02.09 | 745 | Sam | no  | 13.88 | before_cleaning | controlled |
| 09.02.09 | 795 | Luk | no  | 9.26  | before_cleaning | free       |
| 09.02.09 | 800 | Edg | no  | 14.59 | before_cleaning | free       |
| 10.02.09 | 625 | Zor | no  | 11.28 | before_cleaning | free       |
| 10.02.09 | 750 | Sun | no  | 12.75 | after_training  | controlled |
| 10.02.09 | 820 | Sam | no  | 9.52  | after_training  | controlled |
| 10.02.09 | 825 | Car | yes | 9.05  | before_cleaning | controlled |
| 11.02.09 | 705 | Sun | no  | 12.57 | after_training  | controlled |
| 11.02.09 | 810 | Tin | yes | 19.79 | before_cleaning | controlled |
| 11.02.09 | 840 | Luk | no  | 6.52  | before_cleaning | free       |
| 12.02.09 | 685 | Car | yes | 8.08  | before_cleaning | controlled |
| 12.02.09 | 825 | Fer | no  | 20.52 | before_cleaning | controlled |
| 12.02.09 | 890 | Sam | no  | 37.62 | before_cleaning | controlled |
| 13.02.09 | 735 | Wal | yes | 5.71  | before_cleaning | controlled |
| 13.02.09 | 735 | Tin | yes | 29.97 | before_cleaning | controlled |
| 13.02.09 | 740 | Nic | yes | 23.01 | before_cleaning | controlled |
| 13.02.09 | 780 | Sun | no  | 10.72 | after_training  | controlled |
| 13.02.09 | 810 | Car | yes | 11.62 | before_cleaning | controlled |
| 13.02.09 | 830 | Fer | no  | 29.83 | before_cleaning | controlled |
| 13.02.09 | 850 | Edg | no  | 9.43  | before_cleaning | free       |
| 13.02.09 | 870 | Luk | no  | 15    | before_cleaning | free       |
| 14.02.09 | 450 | Fer | no  | 13.44 | before_cleaning | controlled |
| 16.02.09 | 675 | Sun | no  | 7.85  | after_training  | controlled |
| 16.02.09 | 720 | Fer | no  | 30.05 | before_cleaning | controlled |
| 16.02.09 | 735 | Tin | yes | 23.5  | before_cleaning | controlled |
| 16.02.09 | 785 | Nic | yes | 17.13 | before_cleaning | controlled |
| 16.02.09 | 825 | Sam | no  | 11.18 | before_cleaning | controlled |
| 16.02.09 | 830 | Luk | no  | 18.18 | before_cleaning | free       |
| 17.02.09 | 670 | Luk | no  | 2.9   | before_cleaning | free       |
| 17.02.09 | 805 | Sam | no  | 15.2  | before_cleaning | controlled |
| 17.02.09 | 870 | Sun | no  | 13.15 | after_training  | controlled |
| 18.02.09 | 645 | Edg | no  | 9.39  | before_cleaning | free       |
| 18.02.09 | 675 | Fer | no  | 11.16 | before_cleaning | controlled |

|          |     |     |     |       |                 |            |
|----------|-----|-----|-----|-------|-----------------|------------|
| 18.02.09 | 690 | Sun | no  | 22.21 | after_training  | controlled |
| 18.02.09 | 750 | Tin | yes | 28.97 | before_cleaning | controlled |
| 18.02.09 | 830 | Luk | no  | 10.33 | before_cleaning | free       |
| 18.02.09 | 830 | Car | yes | 7.07  | before_cleaning | controlled |
| 19.02.09 | 530 | Fer | no  | 12.29 | before_cleaning | controlled |
| 19.02.09 | 715 | Sun | no  | 8.31  | after_training  | controlled |
| 19.02.09 | 735 | Tin | yes | 39.2  | before_cleaning | controlled |
| 20.02.09 | 590 | Fer | no  | 7.65  | before_cleaning | controlled |
| 20.02.09 | 750 | Tin | yes | 29.27 | before_cleaning | controlled |
| 20.02.09 | 795 | Car | yes | 10.06 | before_cleaning | controlled |
| 23.02.09 | 540 | Hay | yes | 9.12  | after_cleaning  | free       |
| 23.02.09 | 770 | Tin | yes | 16.4  | before_cleaning | controlled |
| 24.02.09 | 750 | Tin | yes | 21.7  | before_cleaning | controlled |
| 24.02.09 | 795 | Car | yes | 6.39  | before_cleaning | controlled |
| 24.02.09 | 820 | Fer | no  | 7.89  | before_cleaning | controlled |
| 25.02.09 | 540 | Fer | no  | 6.77  | before_cleaning | controlled |
| 25.02.09 | 710 | Syl | yes | 19.73 | after_cleaning  | controlled |
| 25.02.09 | 760 | Tin | yes | 29.86 | before_cleaning | controlled |
| 25.02.09 | 875 | Sam | no  | 5.55  | before_cleaning | controlled |
| 26.02.09 | 690 | Syl | yes | 17.52 | after_cleaning  | controlled |
| 26.02.09 | 720 | Tin | yes | 27.39 | before_cleaning | controlled |
| 26.02.09 | 830 | Car | yes | 6.91  | before_cleaning | controlled |
| 26.02.09 | 840 | Sam | no  | 8.51  | before_cleaning | controlled |
| 27.02.09 | 675 | Wal | yes | 7.75  | before_cleaning | controlled |
| 27.02.09 | 715 | Sam | no  | 9.31  | before_cleaning | controlled |
| 27.02.09 | 770 | Tin | yes | 30.19 | before_cleaning | controlled |
| 27.02.09 | 820 | Car | yes | 6.35  | before_cleaning | controlled |
| 01.03.09 | 700 | Fer | no  | 3.34  | before_cleaning | free       |
| 02.03.09 | 550 | Fer | no  | 3.23  | before_cleaning | controlled |
| 02.03.09 | 680 | Wal | yes | 7.69  | after_training  | controlled |
| 02.03.09 | 760 | Tin | yes | 9.33  | before_cleaning | controlled |
| 02.03.09 | 765 | Car | yes | 10.15 | before_cleaning | controlled |
| 02.03.09 | 825 | Sun | no  | 6.72  | after_training  | controlled |
| 02.03.09 | 840 | Luk | no  | 11.46 | before_cleaning | free       |
| 02.03.09 | 855 | Edg | no  | 4.44  | before_cleaning | free       |
| 03.03.09 | 738 | Sam | no  | 28.59 | before_cleaning | controlled |
| 03.03.09 | 750 | Car | yes | 7.24  | before_cleaning | controlled |
| 03.03.09 | 795 | Sun | no  | 9.92  | after_training  | controlled |
| 03.03.09 | 795 | Tin | yes | 10.22 | before_cleaning | controlled |
| 03.03.09 | 850 | Fer | no  | 8.9   | before_cleaning | controlled |
| 04.03.09 | 750 | Sam | no  | 7.5   | before_cleaning | controlled |
| 04.03.09 | 795 | Tin | yes | 10.81 | before_cleaning | controlled |
| 04.03.09 | 805 | Fer | no  | 3.77  | before_cleaning | controlled |
| 04.03.09 | 930 | Sun | no  | 7.03  | after_training  | controlled |
| 05.03.09 | 790 | Sun | no  | 6.97  | after_training  | controlled |

|          |     |     |     |       |                 |            |
|----------|-----|-----|-----|-------|-----------------|------------|
| 05.03.09 | 810 | Sam | no  | 7.5   | before_cleaning | controlled |
| 06.03.09 | 565 | Sam | no  | 20.68 | before_cleaning | controlled |
| 06.03.09 | 740 | Car | yes | 17.3  | before_cleaning | controlled |
| 06.03.09 | 810 | Sun | no  | 8.54  | after_training  | controlled |
| 06.03.09 | 850 | Fer | no  | 12.13 | before_cleaning | controlled |
| 08.03.09 | 840 | Fer | no  | 2.27  | before_cleaning | free       |
| 09.03.09 | 720 | Sun | no  | 6.15  | after_training  | controlled |
| 09.03.09 | 725 | Fer | no  | 2.01  | before_cleaning | free       |
| 09.03.09 | 785 | Wal | yes | 4.87  | before_cleaning | controlled |
| 09.03.09 | 820 | Luk | no  | 5.34  | before_cleaning | free       |
| 09.03.09 | 840 | Edg | no  | 5.36  | before_cleaning | free       |
| 10.03.09 | 530 | Sam | no  | 9.13  | before_cleaning | controlled |
| 10.03.09 | 775 | Car | yes | 10.28 | before_cleaning | controlled |
| 10.03.09 | 815 | Edg | no  | 4.18  | before_cleaning | free       |
| 10.03.09 | 810 | Sun | no  | 6.6   | after_training  | controlled |
| 11.03.09 | 600 | Fer | no  | 15.79 | before_cleaning | free       |
| 11.03.09 | 730 | Sun | no  | 6.62  | after_training  | controlled |
| 11.03.09 | 780 | Edg | no  | 4.75  | before_cleaning | free       |
| 11.03.09 | 805 | Wal | yes | 5.61  | before_cleaning | controlled |
| 12.03.09 | 600 | Fer | no  | 3.04  | before_cleaning | free       |
| 12.03.09 | 695 | Car | yes | 10.74 | before_cleaning | controlled |
| 12.03.09 | 720 | Sun | no  | 7.59  | after_training  | controlled |
| 12.03.09 | 860 | Edg | no  | 4.65  | before_cleaning | free       |
| 13.03.09 | 530 | Fer | no  | 3.1   | before_cleaning | free       |
| 13.03.09 | 545 | Sam | no  | 12    | before_cleaning | controlled |
| 13.03.09 | 705 | Car | yes | 7.97  | before_cleaning | controlled |
| 14.03.09 | 485 | Fer | no  | 2.54  | before_cleaning | free       |
| 15.03.09 | 590 | Fer | no  | 4.25  | before_cleaning | free       |
| 16.03.09 | 680 | Wal | yes | 7.85  | after_cleaning  | free       |
| 16.03.09 | 755 | Nic | yes | 20.63 | after_cleaning  | free       |
| 16.03.09 | 860 | Fer | no  | 9.75  | after_training  | controlled |
| 16.03.09 | 870 | Edg | no  | 5.85  | before_cleaning | free       |
| 16.03.09 | 900 | Luk | no  | 12.47 | before_cleaning | free       |
| 16.03.09 | 910 | Sun | no  | 4.02  | after_training  | controlled |
| 17.03.09 | 520 | Sam | no  | 20.1  | before_cleaning | free       |
| 17.03.09 | 750 | Sun | no  | 6     | after_training  | controlled |
| 17.03.09 | 800 | Edg | no  | 5.41  | before_cleaning | free       |
| 17.03.09 | 815 | Luk | no  | 6.04  | before_cleaning | free       |
| 18.03.09 | 535 | Fer | no  | 12.29 | before_cleaning | controlled |
| 18.03.09 | 665 | Wal | yes | 8.21  | after_training  | controlled |
| 18.03.09 | 700 | Hay | yes | 4.26  | after_cleaning  | controlled |
| 18.03.09 | 780 | Luk | no  | 5.72  | before_cleaning | free       |
| 18.03.09 | 820 | Edg | no  | 11.37 | before_cleaning | free       |
| 18.03.09 | 870 | Sun | no  | 6.39  | after_training  | controlled |
| 19.03.09 | 780 | Sun | no  | 5.18  | after_training  | controlled |

|          |      |     |     |       |                 |            |
|----------|------|-----|-----|-------|-----------------|------------|
| 20.03.09 | 840  | Sun | no  | 4.99  | after_training  | controlled |
| 23.03.09 | 420  | Hay | yes | 9.53  | after_cleaning  | free       |
| 23.03.09 | 465  | Car | yes | 12.08 | after_cleaning  | free       |
| 23.03.09 | 520  | Fer | no  | 3.08  | before_cleaning | free       |
| 23.03.09 | 645  | Nic | yes | 12.25 | after_cleaning  | free       |
| 25.03.09 | 525  | Fer | no  | 6.38  | before_cleaning | free       |
| 27.03.09 | 740  | Fer | no  | 11.69 | before_cleaning | free       |
| 30.03.09 | 745  | Hay | yes | 10.77 | after_cleaning  | controlled |
| 30.03.09 | 805  | Car | yes | 23.49 | after_cleaning  | free       |
| 30.03.09 | 790  | Edg | no  | 11.07 | before_cleaning | free       |
| 30.03.09 | 840  | Sun | no  | 12.6  | after_training  | controlled |
| 30.03.09 | 860  | Sam | no  | 28.09 | before_cleaning | free       |
| 31.03.09 | 830  | Car | yes | 5.61  | before_cleaning | free       |
| 31.03.09 | 930  | Sun | no  | 5.71  | after_training  | controlled |
| 01.04.09 | 540  | Fer | no  | 9.45  | before_cleaning | free       |
| 01.04.09 | 810  | Sun | no  | 10.23 | after_training  | controlled |
| 01.04.09 | 835  | Hay | yes | 5.11  | before_cleaning | free       |
| 02.04.09 | 725  | Sam | no  | 12.51 | before_cleaning | controlled |
| 02.04.09 | 735  | Nic | yes | 13.29 | before_cleaning | controlled |
| 02.04.09 | 820  | Sun | no  | 9.87  | after_training  | controlled |
| 03.04.09 | 660  | Sam | no  | 9.24  | before_cleaning | controlled |
| 03.04.09 | 690  | Car | yes | 8.73  | before_cleaning | free       |
| 03.04.09 | 850  | Hay | yes | 4.68  | before_cleaning | free       |
| 03.04.09 | 1050 | Sun | no  | 7.41  | after_training  | controlled |
| 06.04.09 | 720  | Sam | no  | 11.91 | before_cleaning | controlled |
| 06.04.09 | 735  | Sun | no  | 16.92 | after_training  | controlled |
| 06.04.09 | 740  | Hay | yes | 12.51 | before_cleaning | free       |
| 06.04.09 | 780  | Pie | yes | 16.15 | after_cleaning  | controlled |
| 06.04.09 | 900  | Car | yes | 7.09  | before_cleaning | free       |
| 07.04.09 | 540  | Fer | no  | 5.2   | before_cleaning | free       |
| 07.04.09 | 577  | Sam | no  | 17.47 | before_cleaning | controlled |
| 07.04.09 | 960  | Sun | no  | 4.22  | after_training  | controlled |
| 08.04.09 | 740  | Hay | yes | 13.35 | after_cleaning  | free       |
| 08.04.09 | 785  | Car | yes | 5.6   | before_cleaning | free       |
| 08.04.09 | 900  | Sun | no  | 5.82  | after_training  | controlled |
| 08.04.09 | 915  | Zor | no  | 12.36 | before_cleaning | free       |
| 10.04.09 | 705  | Hay | yes | 12.94 | before_cleaning | free       |
| 11.04.09 | 820  | Fer | no  | 1.36  | before_cleaning | free       |
| 12.04.09 | 760  | Hay | yes | 6.64  | after_cleaning  | free       |
| 12.04.09 | 785  | Car | yes | 17.66 | after_cleaning  | free       |
| 12.04.09 | 785  | Fer | no  | 2.4   | before_cleaning | free       |
| 13.04.09 | 800  | Fer | no  | 2.36  | before_cleaning | free       |
| 14.04.09 | 550  | Fer | no  | 6.64  | before_cleaning | controlled |
| 14.04.09 | 755  | Sam | no  | 19.06 | before_cleaning | controlled |
| 14.04.09 | 885  | Sun | no  | 8.99  | after_training  | controlled |



|          |      |     |     |       |                 |            |
|----------|------|-----|-----|-------|-----------------|------------|
| 14.04.09 | 900  | Car | yes | 5.45  | before_cleaning | free       |
| 14.04.09 | 1080 | Hay | yes | 7.14  | before_cleaning | free       |
| 15.04.09 | 510  | Sam | no  | 23.1  | before_cleaning | controlled |
| 15.04.09 | 600  | Car | yes | 12.16 | after_cleaning  | free       |
| 15.04.09 | 790  | Tin | yes | 13.36 | before_cleaning | controlled |
| 15.04.09 | 815  | Nic | yes | 20.28 | after_cleaning  | controlled |
| 15.04.09 | 855  | Sun | no  | 3.68  | after_training  | controlled |
| 15.04.09 | 920  | Zor | no  | 6.41  | before_cleaning | free       |
| 16.04.09 | 505  | Fer | no  | 17.58 | before_cleaning | controlled |
| 16.04.09 | 741  | Sam | no  | 21.74 | before_cleaning | controlled |
| 16.04.09 | 840  | Sun | no  | 4.05  | before_cleaning | controlled |
| 17.04.09 | 515  | Fer | no  | 31.82 | before_cleaning | controlled |
| 17.04.09 | 660  | Sun | no  | 5.15  | after_training  | controlled |
| 17.04.09 | 765  | Car | yes | 18.48 | after_cleaning  | free       |
| 17.04.09 | 790  | Hay | yes | 2.67  | before_cleaning | free       |
| 20.04.09 | 495  | Fer | no  | 6.86  | before_cleaning | controlled |
| 20.04.09 | 615  | Car | yes | 20.62 | after_cleaning  | free       |
| 20.04.09 | 715  | Sun | no  | 11.76 | after_training  | controlled |
| 20.04.09 | 810  | Hay | yes | 5.52  | before_cleaning | free       |
| 20.04.09 | 830  | Tin | yes | 10.21 | after_cleaning  | free       |
| 20.04.09 | 923  | Zor | no  | 15.26 | before_cleaning | free       |
| 21.04.09 | 525  | Fer | no  | 28.58 | before_cleaning | controlled |
| 21.04.09 | 670  | Sun | no  | 7.84  | after_training  | controlled |
| 21.04.09 | 800  | Sam | no  | 10.29 | before_cleaning | controlled |
| 21.04.09 | 833  | Zor | no  | 8.24  | before_cleaning | free       |
