# Supplementary material for: Assessment of stress responses in rhesus macaques (Macaca mulatta) to daily routine procedures in system neuroscience based on salivary cortisol concentrations
Source: PubMed Central journal article supplement (PMC5749769; doi:10.1371/journal.pone.0190190), 2018-01-02
Supplement: pone.0190190.s002.pdf [file pone.0190190.s002.pdf]

**S1 Table. Summary of cortisol values per animal and condition.** Mean cortisol values (ln-transformed) per animal and condition.

| individual | before cleaning |              | after cleaning |              | after training |
|------------|-----------------|--------------|----------------|--------------|----------------|
|            | free fluid      | contr. fluid | free fluid     | contr. fluid | contr. fluid   |
| Car        | 1.97            | 2.38         | 2.67           | 2.40         |                |
| Edg        | 2.00            |              |                |              |                |
| Fer        | 1.36            | 2.46         |                |              | 2.67           |
| Gra        |                 | 2.91         |                |              | 3.05           |
| Hay        | 1.70            | 1.70         | 1.89           | 1.99         | 1.25           |
| Luk        | 2.32            |              |                |              |                |
| Mar        |                 | 2.31         |                |              |                |
| Nic        | 2.38            | 2.78         | 2.54           | 3.01         |                |
| Pie        | 1.21            | 2.86         | 2.46           | 2.77         |                |
| Sam        | 3.17            | 2.58         |                |              | 2.20           |
| Sun        | 1.67            | 2.42         |                |              | 2.28           |
| Syl        | 2.20            | 2.65         | 2.59           | 2.65         |                |
| Tin        | 2.25            | 2.97         | 2.32           | 2.40         |                |
| Wal        | 2.05            | 1.86         | 2.16           | 1.95         | 2.06           |
| Zor        | 2.04            |              |                |              |                |
